# Supplementary material for: Adhesion and Structural Changes of PEGylated Lipid Nanocarriers on Silica Surfaces
Source: MDPI journal article supplement (doi:10.3390/physchem1020009), 2021-07-15
Supplement: s1 [file s1]

## Supplementary materials

### Adhesion and structural changes of PEGylated lipid nanocarriers on silica surfaces

Philipp Grad, Katarina Edwards and Víctor Agmo Hernández

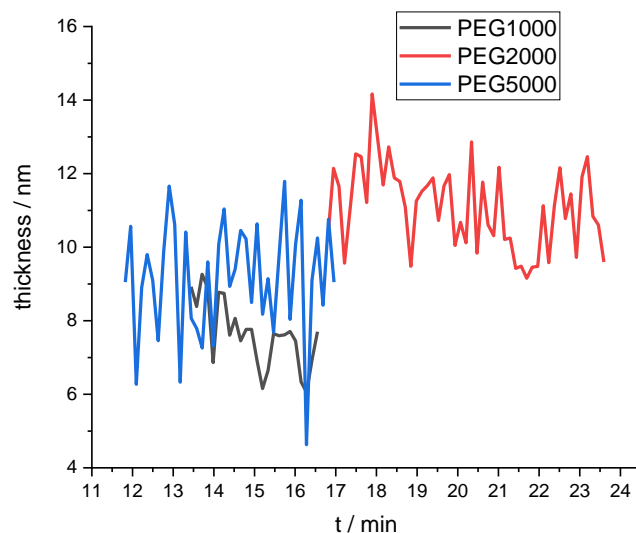

**Figure S1** Calculated thickness of the lipodisks films formed on silica coated MP-SPR sensors. The lipodisks are composed of DSPC:DSPE-PEG $x$  with a molar fraction of 80:20 and  $x=1000$  (black line),  $x=2000$  (red line) and  $x=5000$  (blue line). The measurement was performed at 21 °C

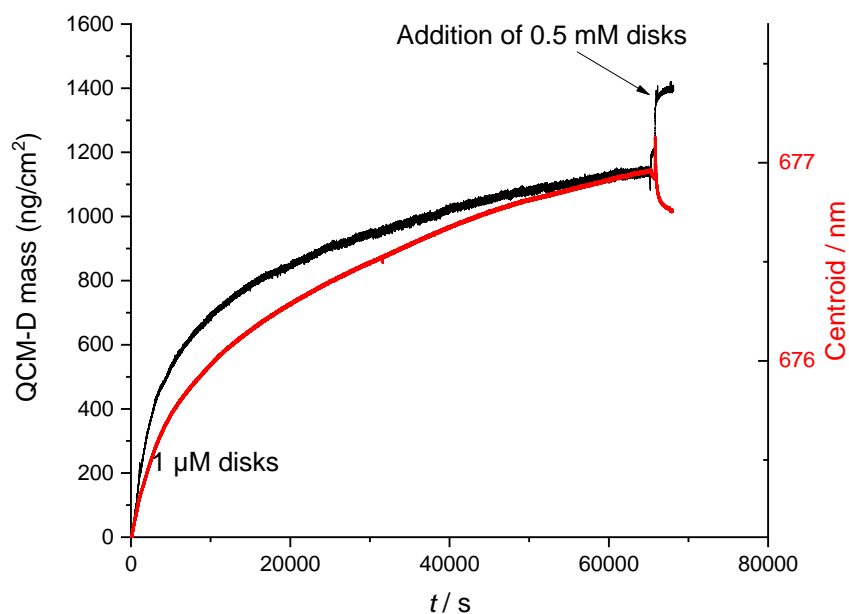

**Figure S2** Simultaneously obtained QCM-D calculated mass and centroid position of the NPS signal for 1  $\mu\text{M}$  lipodisks adsorbing on a silica sensor. The lipodisks are composed of DSPC:DSPE-PEG2000 with a molar fraction of 80:20. The measurement was performed at 21 °C

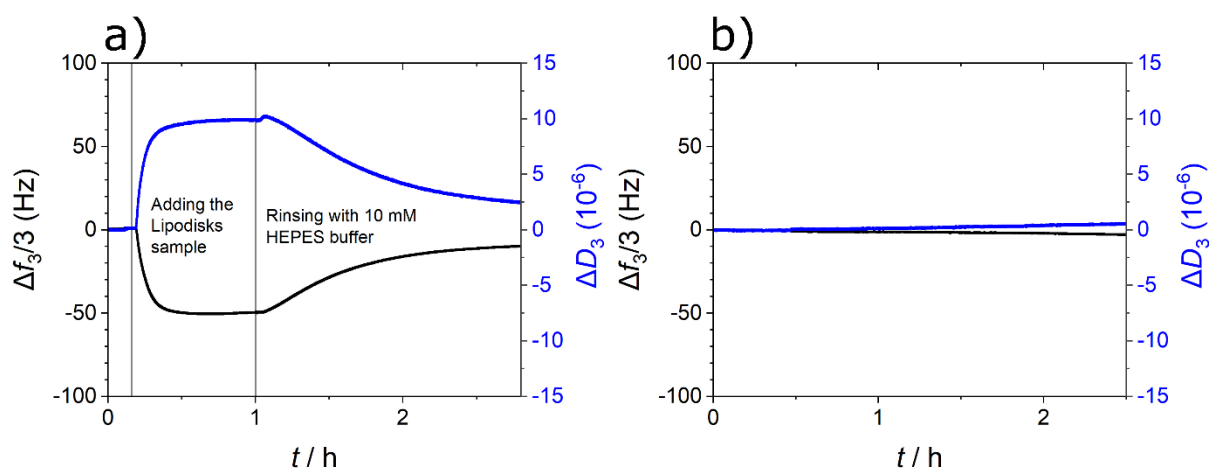

**Figure S3** QCM-D graphs of the sample composed of DSPC:DPSE-PEG5000 with molar fractions of 75:25 applied to a silica sensor equilibrated with a) 10 mM HEPES buffer with 150 mM NaCl or b) with 10 mM HEPES buffer with 75 mM  $\text{CaCl}_2$ . Samples measured at 25°C.

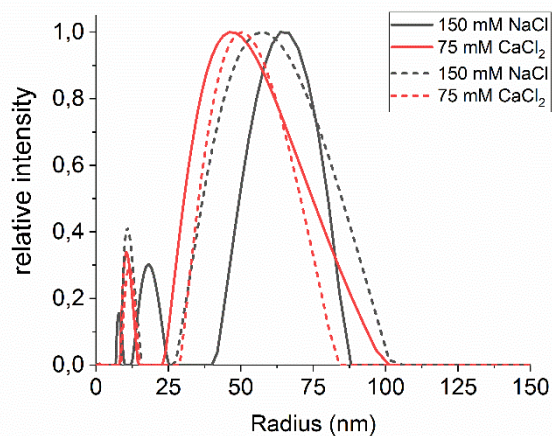

**Figure S4** Comparative DLS experiments of samples composed of DSPC:DSPE-PEG2000 with molar fractions of 75:25. The samples have been dispersed in 10 mM HEPES buffer with 150 mM NaCl (black lines) or 75 mM  $\text{CaCl}_2$  (red lines). The samples have been measured 2 hours (solid lines) and 3 days (dashed lines) after being dispersed.
