# Supplementary material for: Adhesion and Structural Changes of PEGylated Lipid Nanocarriers on Silica Surfaces
Source: MDPI journal article supplement (doi:10.3390/physchem1020009), 2021-07-15
Supplement: s1 [file s1]

Archive with 1 entries (1 files):
- physchem-1259271-supplementary.pdf
